# Supplementary material for: TGMF-pose: text-guided multi-view 3D pose estimation and fusion network for online sports instruction
Source: PeerJ journal article supplement (doi:10.7717/peerj-cs.3560), 2026-02-05
Supplement: SupplementalMat.docx [file SupplementalMat.docx]

1. **Additional Results of Visualization:**

To further assess the generalization capacity and practical utility of the proposed TGMF-Pose framework beyond conventional benchmarks, we conducted an additional evaluation using sports imagery sourced directly from the internet. This dataset contains a diverse set of images depicting athletes engaged in various sports under uncontrolled conditions, including varying lighting, camera angles, clothing, occlusions, and background clutter. These settings serve as a proxy for real-world online physical education environments.

Figure S1 presents an expanded set of qualitative visualization results generated by our model, covering a wide range of sports activities: basketball, soccer, golf, fencing, shot put, running, high jump, long jump, and tennis. Compared to laboratory settings, these images exhibit more complex backgrounds and greater visual variability, posing significant challenges to accurate human pose estimation. In our pipeline, a standard off-the-shelf 2D human pose detector is first employed to extract 2D keypoints from each image. These 2D poses are then input into TGMF-Pose to infer 3D joint configurations. As shown in Figure S1, the model consistently produces anatomically coherent and structurally complete 3D poses across all sports categories, demonstrating its strong capacity to adapt to unseen environments. Particularly noteworthy is the model’s performance under occlusion. In the tennis scene, for example, the athlete’s right arm is partially occluded by a racket and loose clothing. Despite the occlusion, TGMF-Pose accurately predicts the elbow and wrist positions, aligning well with the human body's natural kinematics. Similarly, in the fencing and golf scenes, where sports equipment often overlaps with limbs, our model maintains correct joint predictions without being misled by object contours.

In addition to qualitative visualizations, we deployed the TGMF-Pose model within an AI-based virtual instructor system to conduct automatic posture assessment in a real-world application setting. A test subject performed a standard sit-up exercise, and the predicted 3D pose was analyzed across key body regions according to biomechanical criteria. The evaluation results are summarized as Figure S2. These detailed regional assessments reveal that TGMF-Pose not only provides visually accurate 3D reconstructions but also yields semantically meaningful pose outputs that can support automatic, interpretable feedback in online sports instruction. By translating estimated skeletal positions into domain-specific posture evaluations, the model demonstrates the potential to act as a reliable backend engine for real-time correction, fitness monitoring, and pedagogical analysis.

Taken together, the results from both the internet imagery evaluation and the AI instructor deployment underscore TGMF-Pose’s robustness and generalizability. Even in the presence of occlusion, complex backgrounds, or imperfect user form, the model consistently infers structurally coherent and biomechanically meaningful 3D poses. This confirms its practical viability in remote learning environments, where accurate, real-time correction is essential for safety and performance. The integration of text-guided semantic modeling and multi-view geometric reasoning not only enhances prediction accuracy, but also enables functional understanding of body mechanics—bridging the gap between pose estimation and intelligent, application-driven instruction.

1. **Hyperparameter Analysis:**

To evaluate the robustness and generalization capability of TGMF-Pose, a sensitivity analysis was conducted on the Human3.6M dataset by systematically varying key hyperparameters, as summarized in Table S1. The analysis investigates the effect of temporal modeling, view synthesis, and text-guided weighting on reconstruction accuracy measured by MPJPE, while balancing computational efficiency and latency.

Temporal window size (K) governs the range of motion context available for each frame. Results show that K = 11 achieves the best trade-off between temporal coherence and inference latency, yielding a medium sensitivity (Δ = 3.2 mm). Shorter windows (e.g., K = 5) underfit dynamic motion cues, whereas overly long windows introduce redundant information and degrade responsiveness. The number of pseudo-views also demonstrates moderate sensitivity (Δ = 2.7 mm). Using three synthesized views provides sufficient geometric diversity for occlusion recovery without excessive computation. Increasing pseudo-views beyond five offers limited accuracy gains while amplifying the cost of feature fusion. Among all hyperparameters, the text-guidance loss weight (λ) exhibits the highest sensitivity (Δ = 5.1 mm). Moderate values (λ ≈ 0.05–0.1) yield optimal semantic-geometric alignment, effectively integrating textual cues with joint-angle and distance modeling. Excessive weighting (λ > 0.2) over-constrains the pose geometry, leading to biased depth estimation when textual descriptions are ambiguous.

By contrast, architectural parameters including attention heads, MVF layers, and MVG layers show low sensitivity (Δ < 2 mm). Eight attention heads are sufficient for stable feature refinement; additional heads marginally improve detail but increase FLOPs. Similarly, four layers in both the Multi-View Fusion (MVF) and Multi-View Generator (MVG) modules achieve a good balance between representational power and efficiency. Deeper configurations (≥ 6 layers) slightly improve reconstruction accuracy but risk overfitting and hinder real-time inference.

Overall, these findings confirm that TGMF-Pose maintains high robustness to most architectural variations. The identified default configuration—K = 11, three pseudo-views, λ = 0.1, and four MVF/MVG layers—achieves the best trade-off between precision, generalization, and computational efficiency, making it well-suited for large-scale deployment in intelligent online sports instruction systems.

1. **Temporal Generalization and Static Text Guidance:**

A potential concern arises regarding the use of a single static text prompt to guide sequences of varying duration and dynamics. In the proposed TGMF-Pose framework, this issue is mitigated by the temporal cross-attention design between text embeddings and motion features. Specifically, the text encoder produces a fixed-length semantic embedding that acts as a global semantic anchor throughout the temporal span, while the Multi-View Generator (MVG) continuously updates frame-level geometric features through self-attention across time. During each attention step, the text embedding participates as a query token, dynamically modulating the attention weights according to the current motion context. Thus, although the text representation remains static in form, its interaction with temporally evolving visual tokens is inherently adaptive, allowing the model to maintain semantic alignment even as the motion progresses or decays.

Empirical results in Table S2 validate this temporal robustness across actions with distinct duration scales. When the input sequence length approximately matches each motion’s natural duration (e.g., 27 frames for Squat, 81 for Dribble, 243 for Tai Chi), TGMF-Pose consistently achieves the lowest MPJPE and the highest text–pose cosine similarity, confirming effective semantic anchoring by a single global text prompt. Shorter inputs lead to under-represented motion context, raising MPJPE by 0.5–3.0 mm, while excessively long inputs introduce redundant frames that dilute attention focus, slightly degrading both geometry accuracy and semantic alignment (e.g., Squat, 243 frames). These results indicate that the static text embedding provides stable, category-level semantic guidance, while the temporal cross-attention mechanism dynamically adapts to different motion durations. Even for long, slowly evolving actions such as Tai Chi, performance remains strong when sufficient temporal evidence is observed, demonstrating that the model generalizes well across duration scales without the need for per-frame textual modulation. This robustness suggests that the text prompt captures category-level semantic intent rather than transient kinematic details, while the Transformer backbone handles the dynamic evolution of motion trajectories. Moreover, the pseudo-view mechanism, which aggregates information from adjacent frames, implicitly reinforces temporal continuity, further reducing dependence on prompt variability.

Nevertheless, we acknowledge architectural limitations associated with very long motion sequences. Transformers exhibit quadratic complexity in sequence length, thus we experimentally set the temporal window to K=11, which balances efficiency and contextual integrity by providing sufficient temporal coverage for motion understanding without incurring substantial computational overhead. Moreover, the fixed text embedding may gradually lose its modulation strength over extended temporal horizons. In future work, we plan to incorporate hierarchical prompt conditioning—where the static global prompt is complemented by lightweight learned sub-prompts derived from local motion segments—to maintain context in long-duration activities.

1. **Computational Complexity Analysis**

All comparative data reported in Table S3 are directly cited from the respective original papers to ensure fair evaluation. The baselines report only the complexity of the 3D estimation network operating on precomputed 2D keypoints. For transparency, the TGMF-Pose rows list the parameters of the proposed 3D modules (18.7 M) followed by the parameter count of the affiliated 2D detector backbones (the “+” terms). As shown, the proposed TGMF-Pose achieves the lowest MPJPE across all variants while maintaining a moderate computational footprint of approximately 0.76 GFLOPs for the 3D estimation module. Compared with transformer-based baselines such as PoseFormer or P-STMO, our architecture attains superior accuracy with lower or comparable complexity. This benefits from our model integrating text-guided multi-view reasoning within a unified framework. Despite a moderate increase in model size, reconstruction accuracy has significantly improved. Although the inference speed of TGMF-Pose is not the absolute fastest, it remains acceptable for real-time 3D pose estimation in online sports instruction scenarios. In practice, the model runs comfortably within the latency budgets of modern GPUs for live video streams, especially when using techniques such as feature caching across adjacent frames, mixed-precision inference, and lightweight pseudo-view reduction.

Furthermore, the comparative results reveal that the ViTPose-B backbone (Xu et al., 2022) consistently leads to the lowest MPJPE, outperforming HRNet-W48 (Sun et al., 2019) and CPN (Chen et al., 2018) under identical 3D modeling conditions. This design choice is motivated by three technical considerations. First, ViTPose provides a globally coherent spatial representation, capturing long-range dependencies across human joints, which complements the multi-view reasoning mechanism of TGMF-Pose. In contrast, CPN and HRNet rely primarily on convolutional hierarchies with limited receptive fields, making them less effective at modeling global spatial correlations when actions involve extensive limb coordination or overlapping body parts. Second, ViTPose exhibits stronger semantic alignment with textual guidance, as its attention-based feature maps naturally align with linguistic prompts that describe joint-level relations (e.g., “extend the right arm” or “bend the left knee”). This improves the effectiveness of the text-guided geometric embedding module. Third, ViTPose offers better parameter–efficiency trade-offs, delivering higher representational capacity per parameter due to its patch-token embedding and self-attention mechanisms, thereby supporting higher-resolution inputs without a proportional rise in FLOPs.

Overall, these results demonstrate that integrating ViTPose as the 2D feature backbone enables TGMF-Pose to achieve the strongest overall performance, leveraging its attention-based representations to reinforce semantic understanding and cross-view geometric reasoning. TGMF-Pose achieves a favorable balance between inference efficiency and reconstruction accuracy, making it suitable for real-time online instruction scenarios.

1. **Discussion on the Robustness of Systems to Real-World Text Input**

The AI Teacher System designed in this article is an intelligent, interactive instructional engine built upon the existing large language model (LLM) architecture, enhanced through Low-Rank Adaptation (LoRA) (Hu et al., 2022), which enables efficient fine-tuning on domain-specific datasets without compromising general linguistic capability. LoRA introduces trainable rank-decomposed matrices into specific layers of the pretrained model, significantly reducing the number of parameters that need to be updated during fine-tuning. This parameter-efficient design allows the system to adapt to new multimodal domains, such as human motion analysis, with minimal computational cost and without catastrophic forgetting—a common issue in full fine-tuning approaches. Specifically, LoRA enables parameter-efficient adaptation while retaining the generalization capacity of the base LLM. During instruction tuning, LoRA constrains fine-tuning updates to low-rank subspaces of the pretrained model, ensuring that the system preserves its prior knowledge of syntax, semantics, and contextual reasoning. LoRA’s low-rank adaptation maintains the model’s inherent contextual disambiguation ability, enabling it to resolve ambiguous or underspecified prompts by leveraging prior linguistic associations and multimodal cues from the pose estimation module. Consequently, it can effectively handle noisy or imperfect user input, including typographical errors, informal expressions, and non-technical vocabulary. For example, phrases such as “arms swing,” “raise your hands,” or “stretch up” are mapped to semantically equivalent canonical motion categories through contextual embedding alignment, leveraging distributed representations learned during large-scale pretraining. When faced with a vague query such as “swing,” the system jointly analyzes textual embeddings and spatial-temporal pose patterns produced by TGMF-Pose to infer the most plausible movement type. This synergy between LoRA-based language understanding and geometric motion reasoning significantly enhances the model’s robustness and interpretability in open-ended natural language environments, enabling precise semantic-motion alignment even under ambiguous linguistic conditions.

In addition, confidence-aware prompt interpretation is supported by the pretrained LLM’s probabilistic attention mechanism, which quantifies textual uncertainty and allows adaptive weighting during motion evaluation. By estimating token-level attention entropy and posterior probability distributions, the system can detect ambiguous linguistic regions and dynamically adjust its inference strategy. When linguistic ambiguity is high, the system can suggest reformulated prompts or clarification questions to ensure reliable performance. Empirical testing of the LoRA-adapted model maintains stable evaluation accuracy across a wide range of natural text inputs, demonstrating strong generalization to the diverse, imperfect linguistic conditions typical of online physical education settings. This indicates that the combination of LoRA-based parameter-efficient fine-tuning, multimodal contextual reasoning, and probabilistic interpretive mechanisms provides a theoretically grounded and practically robust foundation for intelligent motion instruction.

1. **Effect of Text-Guided Prompts in Differentiating Visually Similar Actions**

In this section, we delve deeper into the impact of Text-Guided Prompts (TGPE) on the ability of the AI teacher system to provide accurate teaching feedback, particularly for visually similar actions that differ significantly in intent and technical execution, as shown in Figure S3. We focus on understanding how the incorporation of textual prompts influences the discrimination of such actions and the subsequent accuracy of the feedback generated by the AI. Table S4 illustrates how TGPE improves discrimination between actions and refines feedback accuracy.

Without TGPE, the AI teacher tends to provide generic feedback that overlooks key technical aspects. For example, in a crunch, the system might simply advise, "tighten your core," without addressing the insufficient trunk flexion. However, with TGPE, the system identifies the lack of lumbar flexion and offers more specific guidance, such as "increase trunk elevation to meet sit-up criteria." Similarly, in the squat vs. lunge task, the non-TGPE system often misidentifies lunges as shallow squats and misses important form details like stride length and knee alignment. With TGPE, the system emphasizes foot placement, knee tracking, and core engagement, helping users differentiate the two exercises and improve their form. In the push-up vs. plank case, the non-TGPE system fails to recognize the dynamic nature of the push-up versus the static plank position, offering basic postural corrections without addressing key movement differences. In contrast, the TGPE-enabled system provides more precise feedback tailored to the specific mechanics of each exercise. For the jump, the non-TGPE system focuses on inconsistent jump height and rigid landing, offering basic advice like "land softly" and "avoid locking knees to prevent joint strain." However, it lacks a deeper analysis of movement coordination, such as arm-leg synchronization or the need for full leg extension during takeoff. The TGPE-enabled system, on the other hand, gives more comprehensive feedback, emphasizing arm-leg coordination, knee flexion for cushioning the landing, and core engagement for stability. This guidance is more targeted and addresses the full scope of movement mechanics.

**References**

Xu Y, Zhang J, Zhang Q, Tao D. 2022. Vitpose: Simple vision transformer baselines for human pose estimation. *Advances in neural information processing systems*, 35, 38571-38584.

Sun K, Xiao B, Liu, D, & Wang J. 2019. Deep high-resolution representation learning for human pose estimation. In *Proceedings of the IEEE/CVF conference on computer vision and pattern recognition* (pp. 5693-5703).

Chen Y, Wang Z, Peng Y, Zhang Z, Yu G, & Sun J. 2018. Cascaded pyramid network for multi-person pose estimation. In *Proceedings of the IEEE conference on computer vision and pattern recognition* (pp. 7103-7112).

Hu EJ, Shen Y, Wallis P, Allen-Zhu Z, Li Y, Wang S, Chen W. 2022. Lora: Low-rank adaptation of large language models. *ICLR*, 1(2): 3.
