# Supplementary material for: TGMF-pose: text-guided multi-view 3D pose estimation and fusion network for online sports instruction
Source: PeerJ journal article supplement (doi:10.7717/peerj-cs.3560), 2026-02-05
Supplement: Table_S1.docx [file Table_S1.docx]

**TABLE S1.** Sensitivity Analysis of Key Hyperparameters in the TGMF-Pose Framework on the Human3.6M Dataset.

| **Hyperparameter** | Default | Range tested | Best MPJPE | Worst MPJPE | Max Δ | Sensitivity |
| --- | --- | --- | --- | --- | --- | --- |
| Temporal window (*K*) | 11 | 5-21 | 38.7 | 41.9 | 3.2 | medium |
| Pseudo-views | 3 | 1-5 | 38.6 | 41.3 | 2.7 | medium |
| *Ltext* weight (*λ*) | 0.1 | 0-0.3 | 38.6 | 43.7 | 5.1 | high |
| Attention heads | 8 | 4-12 | 38.8 | 40.2 | 1.4 | low |
| MVF layers | 4 | 2-8 | 38.5 | 39.8 | 1.3 | low |
| MVG layers | 4 | 2-8 | 38.3 | 40.0 | 1.7 | low |
