# Supplementary material for: TGMF-pose: text-guided multi-view 3D pose estimation and fusion network for online sports instruction
Source: PeerJ journal article supplement (doi:10.7717/peerj-cs.3560), 2026-02-05
Supplement: Table_S2.docx [file Table_S2.docx]

**TABLE** **S2.** **Effect of input sequence length and motion duration on TGMF-Pose (K = 11, 30 fps, Human3.6M).**

| **Motion** | **Duration (s)** | **Frames** | **Coverage vs Typical** | **Text–Pose Cosine** | **MPJPE** | **Δ vs Nominal** |
| --- | --- | --- | --- | --- | --- | --- |
| Squat | Short (0.5-1.5) | 9 | short (partial) | 0.80 ± 0.032 | 39.1 ± 0.48 | +0.5 |
| **27** | **nominal (full)** | **0.82 ± 0.015** | **38.6 ± 0.35** | **--** |
| 81 | long (multi-cycle) | 0.80 ± 0.020 | 39.4 ± 0.44 | +0.8 |
| 243 | very long (redundant) | 0.78 ± 0.031 | 40.7 ± 0.60 | +2.1 |
| Dribble | Medium (2-3) | 9 | short (insufficient) | 0.79 ± 0.033 | 39.6 ± 0.42 | +1.2 |
| 27 | short (partial) | 0.80 ± 0.024 | 39.0 ± 0.36 | +0.6 |
| **81** | **nominal (full)** | **0.82 ± 0.017** | **38.4 ± 0.40** | **--** |
| 243 | long (multi-cycle) | 0.81 ± 0.022 | 38.6 ± 0.55 | +0.2 |
| Tai Chi | Long (4-8) | 9 | short (severely under covered) | 0.75 ± 0.037 | 41.8 ± 0.60 | +3.0 |
| 27 | short (partial) | 0.78 ± 0.025 | 40.2 ± 0.48 | +1.4 |
| 81 | long (partial) | 0.80 ± 0.015 | 39.1 ± 0.44 | +0.3 |
| **243** | **nominal (full)** | **0.82 ± 0.021** | **38.8 ± 0.50** | **--** |
