# Supplementary material for: TGMF-pose: text-guided multi-view 3D pose estimation and fusion network for online sports instruction
Source: PeerJ journal article supplement (doi:10.7717/peerj-cs.3560), 2026-02-05
Supplement: Table_S3.docx [file Table_S3.docx]

**TABLE** **S3.** Comparison of computational complexity on Human3.6M Dataset. The items in the “+” section derive from the resource consumption of the 2D pose estimation backbone.

| **Methods** | **Frames** | **Params (M)** | **FLOPs (M)** | **Time (ms/frame)** | **MPJPE** |
| --- | --- | --- | --- | --- | --- |
| Anatomy3D | 243 | 59.2 | 116 | 0.12 | 44.1 |
| PoseFormer | 81 | 9.6 | 1358 | 1.40 | 44.3 |
| MHFormer | 27 | 18.9 | 1054 | 1.13 | 45.9 |
| P-STMO | 243 | 6.7 | 1737 | 1.72 | 42.8 |
| MixSTE | 243 | -- | 645 | 0.65 | 40.9 |
| PATA | 243 | 6.2 | 3833 | 3.81 | 43.1 |
| TGMF-Pose (CPN) | 243 | 18.7+102 | 759 | 0.76+0.61 | 39.7 |
| TGMF-Pose (HRNet-W48) | 243 | 18.7+64 | 759 | 0.76+1.54 | 39.2 |
| TGMF-Pose (ViTPose-B) | **243** | **18.7+86** | **759** | **0.76+1.06** | **38.6** |
