# Supplementary material for: TGMF-pose: text-guided multi-view 3D pose estimation and fusion network for online sports instruction
Source: PeerJ journal article supplement (doi:10.7717/peerj-cs.3560), 2026-02-05
Supplement: Table_S4.docx [file Table_S4.docx]

**TABLE S4.** Textual Feedback from AI Teacher System with and without Text-Guided Prompt Embedding.

| **Action** | **Evaluation (w/o TGPE)** | **Evaluation (w/ TGPE)** |
| --- | --- | --- |
| Sit-up | Your upper body is not lifting very high. You might need to engage your core more. Try to keep your knees bent and feet flat on the ground. Raise your upper body higher and tighten your core more during the movement. Safety Notes: Don’t strain your neck. | The sit-up is incomplete as the trunk elevation is insufficient, likely due to poor core engagement. You should aim to flex your torso at least 30 degrees to activate the core. Engage your abdominal muscles more, and focus on maintaining a neutral spine throughout. Ensure a smooth movement without jerking. Safety Notes: Keep your neck relaxed and avoid excessive forward bending to protect your cervical spine. |
| Squat | Your squat depth is not enough, and your knees are slightly collapsing inward. Try to squat deeper and push your knees outward. Safety Notes: Keep your weight on the heels. Be cautious with your knees to avoid injury. | The squat depth is insufficient, and there’s slight inward collapse of the knees. The chest is leaning forward too much. Aim for at least parallel thigh depth while keeping the knees aligned with the toes. Engage your core to keep your chest upright. Safety Notes: Ensure your knees track over your toes and your weight is on your heels to prevent strain on the knees. Keep your back straight to avoid overloading your lumbar spine. |
| Plank | Your body position is stable, but the movement lacks fluidity. Keep your arms straight and your back neutral. Focus on maintaining a straight body from head to heels. Safety Notes: Keep your neck aligned with your spine to avoid strain. | The body is not in a straight line, with a noticeable sag in the hips. The core is weak, and the pelvis is tilted, indicating insufficient muscle engagement. Tighten your core and glutes to maintain a straight body from head to heels. Keep your shoulders directly above your elbows and your feet in line with your body. Safety Notes: Avoid lower back arching, which could lead to injury, and keep your neck in alignment with your spine to prevent strain on your cervical vertebrae. |
| Jump | The jump height seems inconsistent, and the landing appears a bit stiff. Try to land softly and bend your knees more when landing. Safety Notes: Don’t lock your knees when landing to prevent joint strain. | The jump height lacks consistency, and your landing is rigid, showing minimal knee flexion. The upper body lacks coordination, with the arms not assisting in the jump’s lift. Use a coordinated push from both your legs and arms to maximize vertical displacement. Ensure a full extension of the legs during takeoff. When landing, bend your knees to cushion the impact and prevent joint stress. Safety Notes: Land with soft knees and avoid locking them. Keep your feet flat and engage your core to stabilize your body during both takeoff and landing. |
